# Supplementary material for: Tuberculosis screening in patients with HIV: use of audit and feedback to improve quality of care in Ghana
Source: PubMed Central journal article supplement (PMC5002398; doi:10.3402/gha.v9.32390), 2016-08-26
Supplement: GHA-9-32390-s001.pdf [file GHA-9-32390-s001.pdf]

**Supplemental material**

To Bjerrum S, Bonsu F, Hansen-Nortey NN et al. *Tuberculosis screening in patients with HIV: Use of audit and feedback to improve quality of care in Ghana*

**A. The Audit Project Odense registration form**

Name: \_\_\_\_\_

**Audit: TB screening among HIV patients - 2. registration**

Registration date:

| 10<br>9<br>8<br>7<br>6<br>5<br>4<br>3<br>2<br>1 | Age (numeric) |     | Sex |   | 1 X                                          | Minimum of 1 x     | Minimum of 1 x | Only 1 x       | Minimum of 1 x | Minimum of 1 x |                          |
|-------------------------------------------------|---------------|-----|-----|---|----------------------------------------------|--------------------|----------------|----------------|----------------|----------------|--------------------------|
|                                                 | Age           | Sex | M   | F | Consultation                                 | Symptoms and signs | WHO            | Recent results | HIV treatment  | Your suspicion | Investigations requested |
|                                                 |               |     |     |   | Initial assessment of new HIV case           |                    |                |                |                |                |                          |
|                                                 |               |     |     |   | Follow-up visit                              |                    |                |                |                |                |                          |
|                                                 |               |     |     |   | Poor general condition                       |                    |                |                |                |                |                          |
|                                                 |               |     |     |   | Significant weight loss in last 3 months     |                    |                |                |                |                |                          |
|                                                 |               |     |     |   | Fever                                        |                    |                |                |                |                |                          |
|                                                 |               |     |     |   | Cough < 2 weeks                              |                    |                |                |                |                |                          |
|                                                 |               |     |     |   | Cough > 2 weeks                              |                    |                |                |                |                |                          |
|                                                 |               |     |     |   | Productive cough                             |                    |                |                |                |                |                          |
|                                                 |               |     |     |   | Haemoptysis                                  |                    |                |                |                |                |                          |
|                                                 |               |     |     |   | Dyspnea                                      |                    |                |                |                |                |                          |
|                                                 |               |     |     |   | Night sweats                                 |                    |                |                |                |                |                          |
|                                                 |               |     |     |   | None of these                                |                    |                |                |                |                |                          |
|                                                 |               |     |     |   | WHO clinical staging (Numeric).              |                    |                |                |                |                |                          |
|                                                 |               |     |     |   | CD4 cell count value (within last ½ year)    |                    |                |                |                |                |                          |
|                                                 |               |     |     |   | Normal chest x-ray (last 3 months)           |                    |                |                |                |                |                          |
|                                                 |               |     |     |   | Abnormal chest X-ray (last 3 months)         |                    |                |                |                |                |                          |
|                                                 |               |     |     |   | Negative sputum smear for AFB (last 1 month) |                    |                |                |                |                |                          |
|                                                 |               |     |     |   | Positive sputum smear for AFB (last 1 month) |                    |                |                |                |                |                          |
|                                                 |               |     |     |   | None of these                                |                    |                |                |                |                |                          |
|                                                 |               |     |     |   | ARV treatment                                |                    |                |                |                |                |                          |
|                                                 |               |     |     |   | Defaulter for > 1 month                      |                    |                |                |                |                |                          |
|                                                 |               |     |     |   | No ARV treatment                             |                    |                |                |                |                |                          |
|                                                 |               |     |     |   | Upper respiratory tract infection            |                    |                |                |                |                |                          |
|                                                 |               |     |     |   | Pneumonia                                    |                    |                |                |                |                |                          |
|                                                 |               |     |     |   | TB suspect                                   |                    |                |                |                |                |                          |
|                                                 |               |     |     |   | Other lung disease                           |                    |                |                |                |                |                          |
|                                                 |               |     |     |   | Known TB case                                |                    |                |                |                |                |                          |
|                                                 |               |     |     |   | None of these                                |                    |                |                |                |                |                          |
|                                                 |               |     |     |   | CD4-cell count                               |                    |                |                |                |                |                          |
|                                                 |               |     |     |   | HIV viral load                               |                    |                |                |                |                |                          |
|                                                 |               |     |     |   | Chest X-ray                                  |                    |                |                |                |                |                          |
|                                                 |               |     |     |   | Sputum smear microscopy for AFB              |                    |                |                |                |                |                          |
|                                                 |               |     |     |   | Sputum TB culture                            |                    |                |                |                |                |                          |
|                                                 |               |     |     |   | Sputum Gene Xpert                            |                    |                |                |                |                |                          |
|                                                 |               |     |     |   | Referral to medical assistant/doctor         |                    |                |                |                |                |                          |
|                                                 |               |     |     |   | Referral to TB specific clinic               |                    |                |                |                |                |                          |
|                                                 |               |     |     |   | Other TB/HIV relevant investigation          |                    |                |                |                |                |                          |
|                                                 |               |     |     |   | None                                         |                    |                |                |                |                |                          |
|                                                 |               |     |     |   | Remarks                                      |                    |                |                |                |                |                          |

©Copyright: Audit Projekt Odense, J.B. Winslows Vej 9A, 1. 5000 Odense C

Each form can capture details of ten patient consultations with registration of one patient consultation per row.

**Supplemental material**

To Bjerrum S, Bonsu F, Hansen-Nortey NN et al. *Tuberculosis screening in patients with HIV: Use of audit and feedback to improve quality of care in Ghana*

**B. Summary instructions for the participants to fill-in the registration form**

| Instructions for the registration chart                 |                                                                                                                                                                                                                                                                                                                                                                                                                                                                                                                                                                                                                                                                                                                                                                                                                                                                                                                      |
|---------------------------------------------------------|----------------------------------------------------------------------------------------------------------------------------------------------------------------------------------------------------------------------------------------------------------------------------------------------------------------------------------------------------------------------------------------------------------------------------------------------------------------------------------------------------------------------------------------------------------------------------------------------------------------------------------------------------------------------------------------------------------------------------------------------------------------------------------------------------------------------------------------------------------------------------------------------------------------------|
| <b>Registrant</b>                                       |                                                                                                                                                                                                                                                                                                                                                                                                                                                                                                                                                                                                                                                                                                                                                                                                                                                                                                                      |
| Name                                                    | Name of registrant (healthcare provider)                                                                                                                                                                                                                                                                                                                                                                                                                                                                                                                                                                                                                                                                                                                                                                                                                                                                             |
| Date                                                    | Registration date, written as DDMMYY                                                                                                                                                                                                                                                                                                                                                                                                                                                                                                                                                                                                                                                                                                                                                                                                                                                                                 |
| <b>Patient consultation</b>                             |                                                                                                                                                                                                                                                                                                                                                                                                                                                                                                                                                                                                                                                                                                                                                                                                                                                                                                                      |
| Age and Sex                                             | Register age in years<br>For sex register M for male and F for female                                                                                                                                                                                                                                                                                                                                                                                                                                                                                                                                                                                                                                                                                                                                                                                                                                                |
| Consultation                                            | Tick the consultation according to type; Initial assessment of a new HIV case coming or Follow-up consultation with a known case previously seen in the clinic.                                                                                                                                                                                                                                                                                                                                                                                                                                                                                                                                                                                                                                                                                                                                                      |
| Symptoms and signs                                      | Tick off minimum 1 column<br>Tick the symptoms and signs that patient presented during consultation being self-reported, verified by clinical examination or derived from your best judgement of the patient. If the patient had no complaint or presented with other symptom/signs than those stated in this group remember to tick in "None of these".<br>For "Poor general condition" tick if the patient is cachectic, unable to stand on own feet, not able to communicate or in a similar severe condition.<br>For "Significant weight loss" tick if unintentional weight loss of $\geq 5\%$ bodyweight within 3 month either self-reported (if new case) or verified by weight noted at previous consultations.<br>For "Fever" tick if self-reported fever or raised temperature measured by thermometer.<br>For "Dyspnoea" tick if self-reported breathlessness and/or patient is dyspnoeic at consultation. |
| WHO                                                     | Indicate the WHO clinical stage in numeric value; 1,2,3,4 <i>if</i> a WHO clinical staging is done during the consultation, or <i>if</i> you use a previous staging in your evaluation of the patient.                                                                                                                                                                                                                                                                                                                                                                                                                                                                                                                                                                                                                                                                                                               |
| Recent results<br>- Tick off minimum 1 column           | Tick if any of the results are present at the consultation.<br>For "CD4 cell count", state the actual value if available within the last 6 months.<br>If none of the results mentioned are available tick in "None of these".                                                                                                                                                                                                                                                                                                                                                                                                                                                                                                                                                                                                                                                                                        |
| HIV treatment<br>- Only 1 tick                          | Tick if patient is already on ARV, has been on ARV but defaulted for minimum 1 month or if the patient has not yet started ARV                                                                                                                                                                                                                                                                                                                                                                                                                                                                                                                                                                                                                                                                                                                                                                                       |
| Outcome<br>- Only 1 tick                                | Tick your primary diagnosis/suspicion based on the consultation. If there is more than one diagnosis you have to decide which one you think is the most important.                                                                                                                                                                                                                                                                                                                                                                                                                                                                                                                                                                                                                                                                                                                                                   |
| Investigations requested<br>- Tick off minimum 1 column | Tick if you made any of the requests mentioned and/or if you did take any of the actions stated. If none of the actions mentioned was taken tick in "none".                                                                                                                                                                                                                                                                                                                                                                                                                                                                                                                                                                                                                                                                                                                                                          |
